# Supplementary material for: Production of Induced Secondary Metabolites by a Co-Culture of Sponge-Associated Actinomycetes, Actinokineospora sp. EG49 and Nocardiopsis sp. RV163
Source: PubMed Central journal article supplement (PMC4052330; doi:10.3390/md12053046), 2014-05-22
Supplement: marinedrugs-12-03046-s001.pdf [file marinedrugs-12-03046-s001.pdf]

# Supplementary Information

**Figure S1.**  $^1\text{H-NMR}$  spectrum of *N*-(2-hydroxyphenyl)-acetamide (**11**) in  $\text{DMSO-}d_6$ .

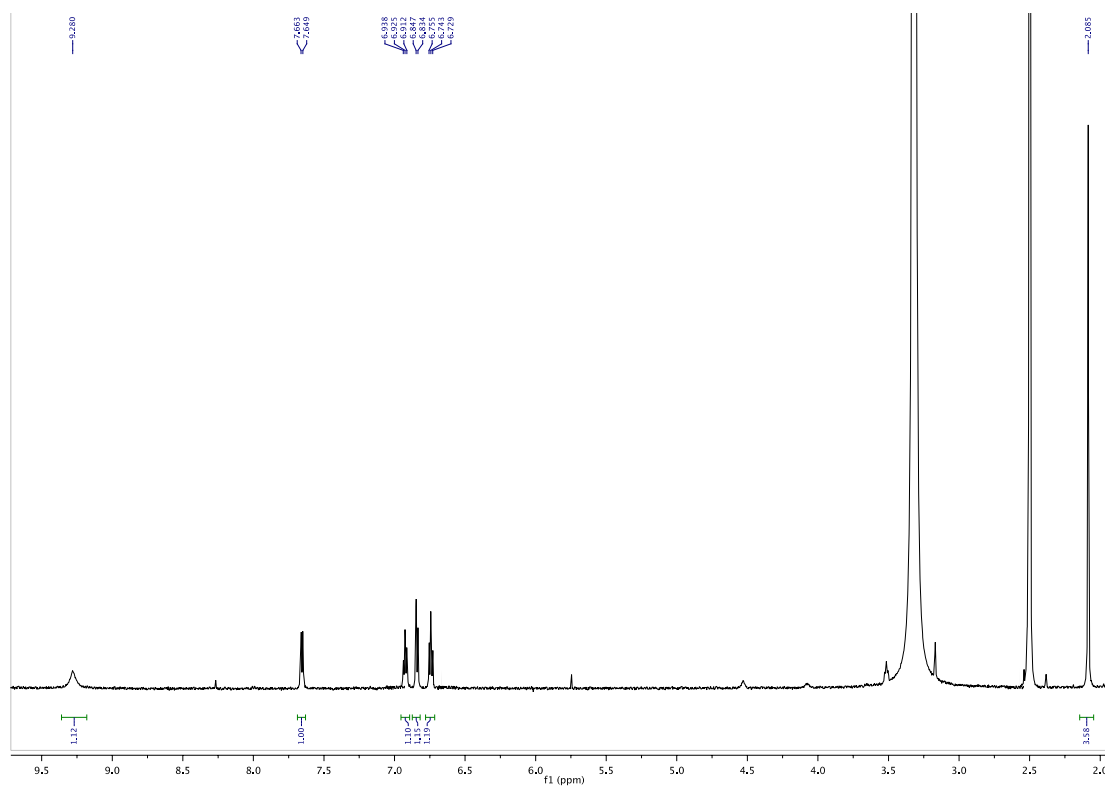

**Figure S2.**  $^1\text{H-NMR}$  spectrum of 1,6-dihydroxyphenazine (**12**) in  $\text{DMSO-}d_6$ .

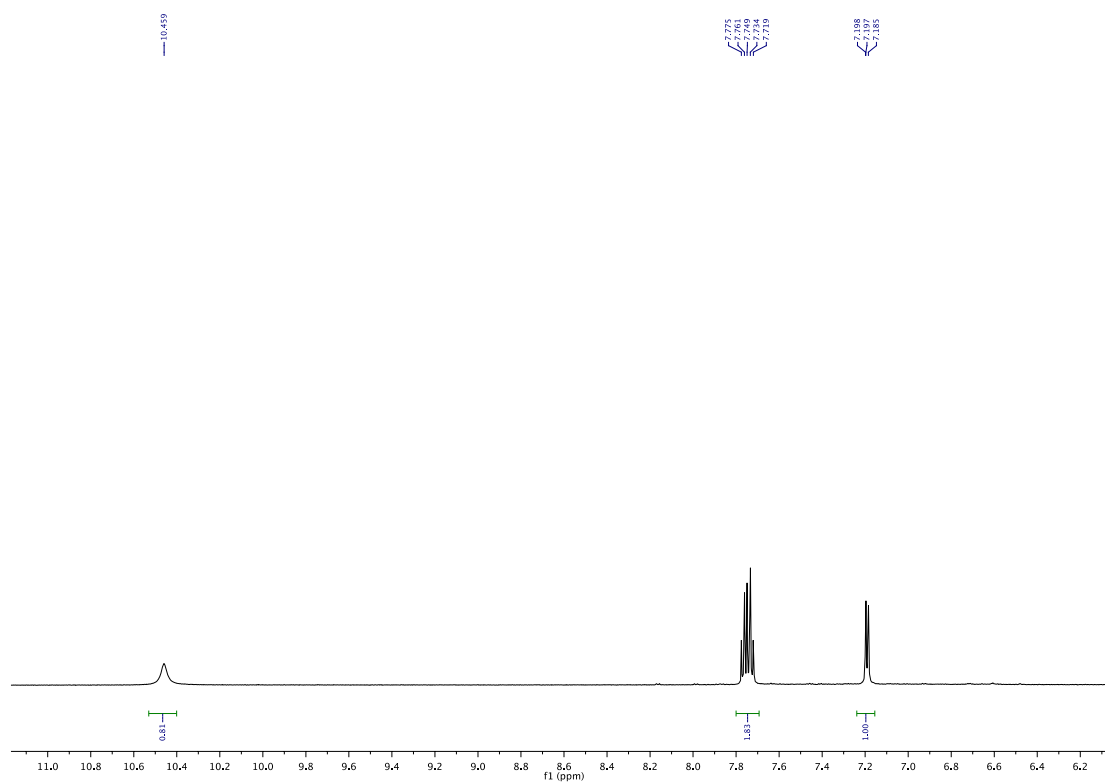

**Figure S3.**  $^1\text{H-NMR}$  spectrum of 5a,6,11a,12-tetrahydro-5a,11a-dimethyl[1,4]benzoxazino [3,2-*b*][1,4]benzoxazine (**13a**) in  $\text{DMSO-}d_6$ .

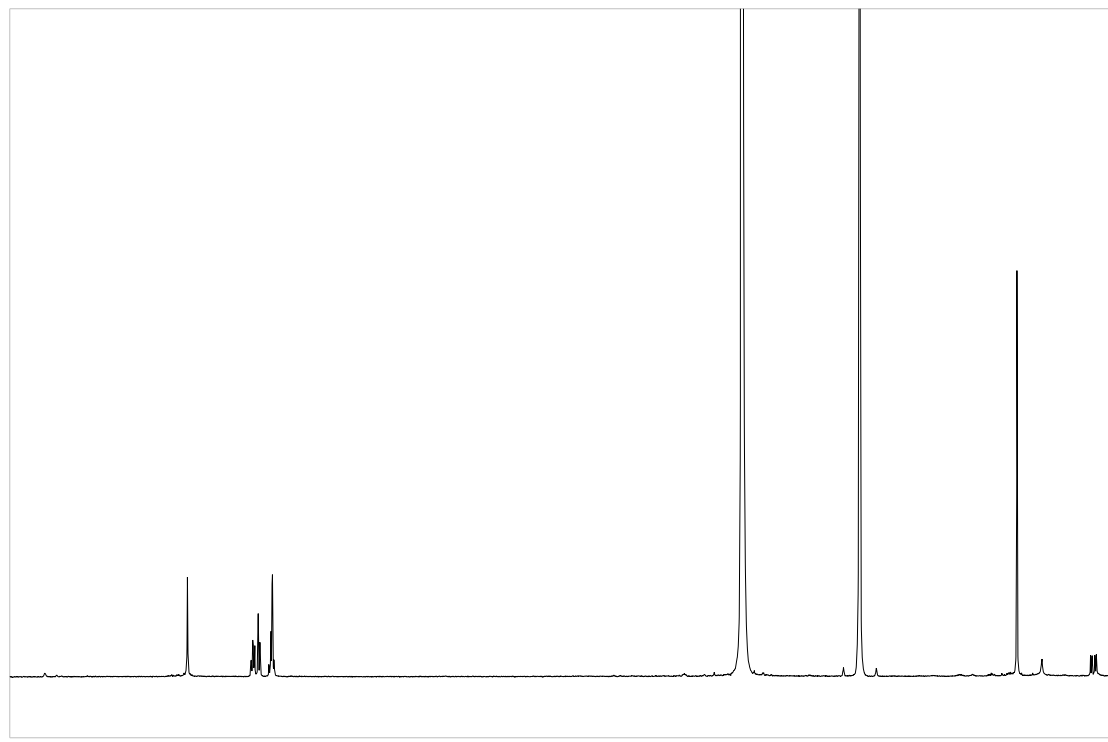

**Figure S4.**  $^{13}\text{C-NMR}$  spectrum of 5a,6,11a,12-tetrahydro-5a,11a-dimethyl[1,4]benzoxazino [3,2-*b*][1,4]benzoxazine (**13a**) in  $\text{DMSO-}d_6$ .

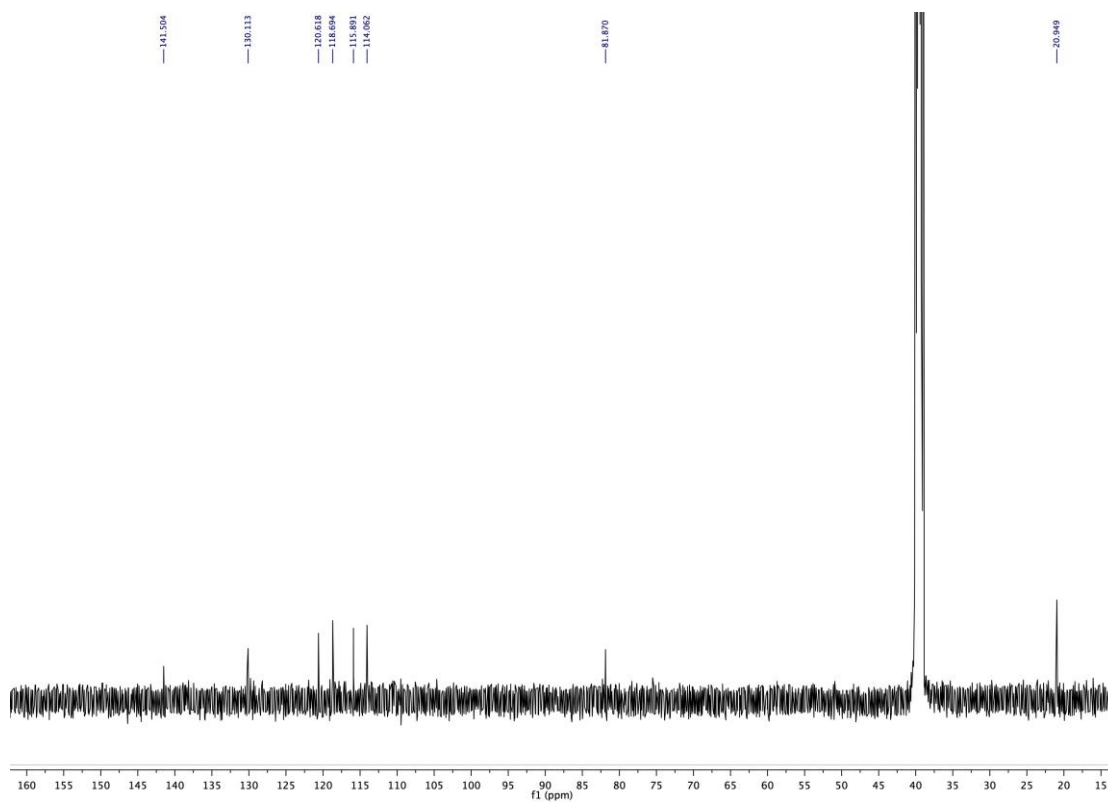

**Figure S5.**  $^1\text{H-NMR}$  spectrum of 5a,6,11a,12-tetrahydro-5a,11a-dimethyl[1,4]benzoxazino[3,2-*b*][1,4]benzoxazine (**13a**) in pyridine- $d_5$ .

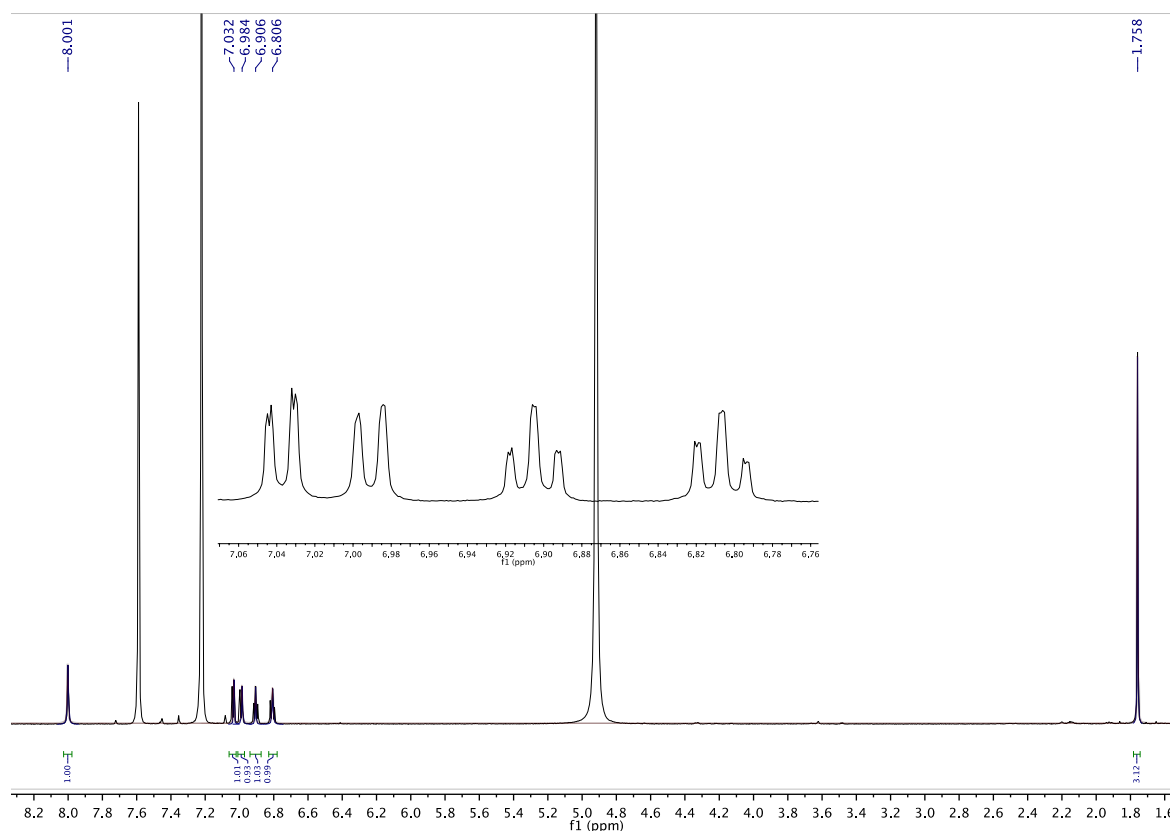

**Figure S6.**  $^{13}\text{C-NMR}$  spectrum of 5a,6,11a,12-tetrahydro-5a,11a-dimethyl[1,4]benzoxazino[3,2-*b*][1,4]benzoxazine (**13a**) in pyridine- $d_5$ .

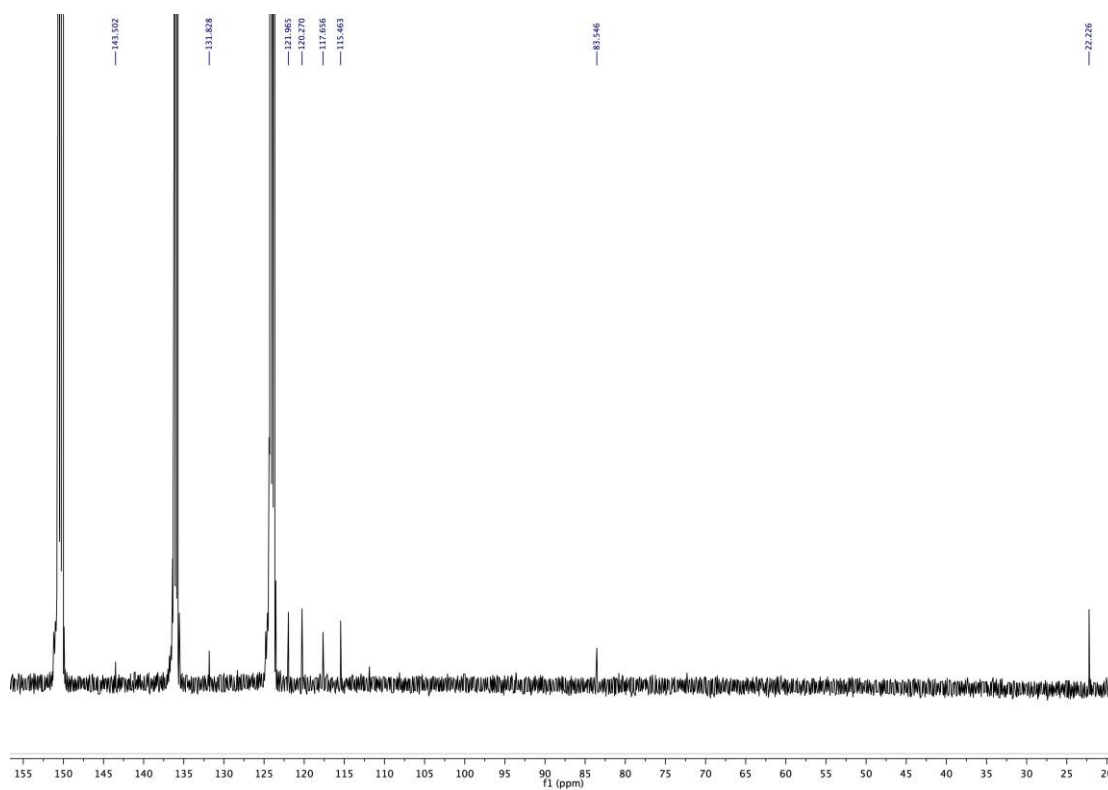

**Figure S7.** Edited gHSQC spectrum of 5a,6,11a,12-tetrahydro-5a,11a-dimethyl[1,4]benzoxazino[3,2-*b*][1,4]benzoxazine (**13a**) in pyridine-*d*<sub>5</sub>.

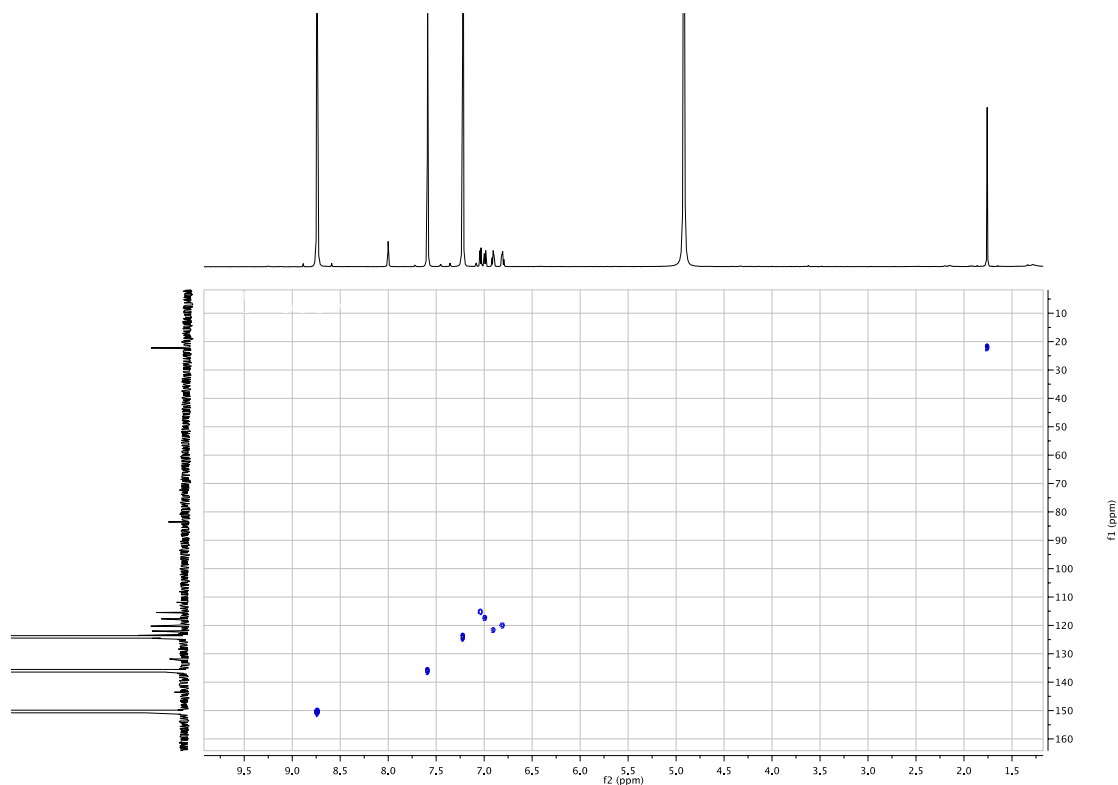

**Figure S8.** HMBC spectrum of 5a,6,11a,12-tetrahydro-5a,11a-dimethyl[1,4]benzoxazino[3,2-*b*][1,4]benzoxazine (**13a**) in pyridine-*d*<sub>5</sub>.

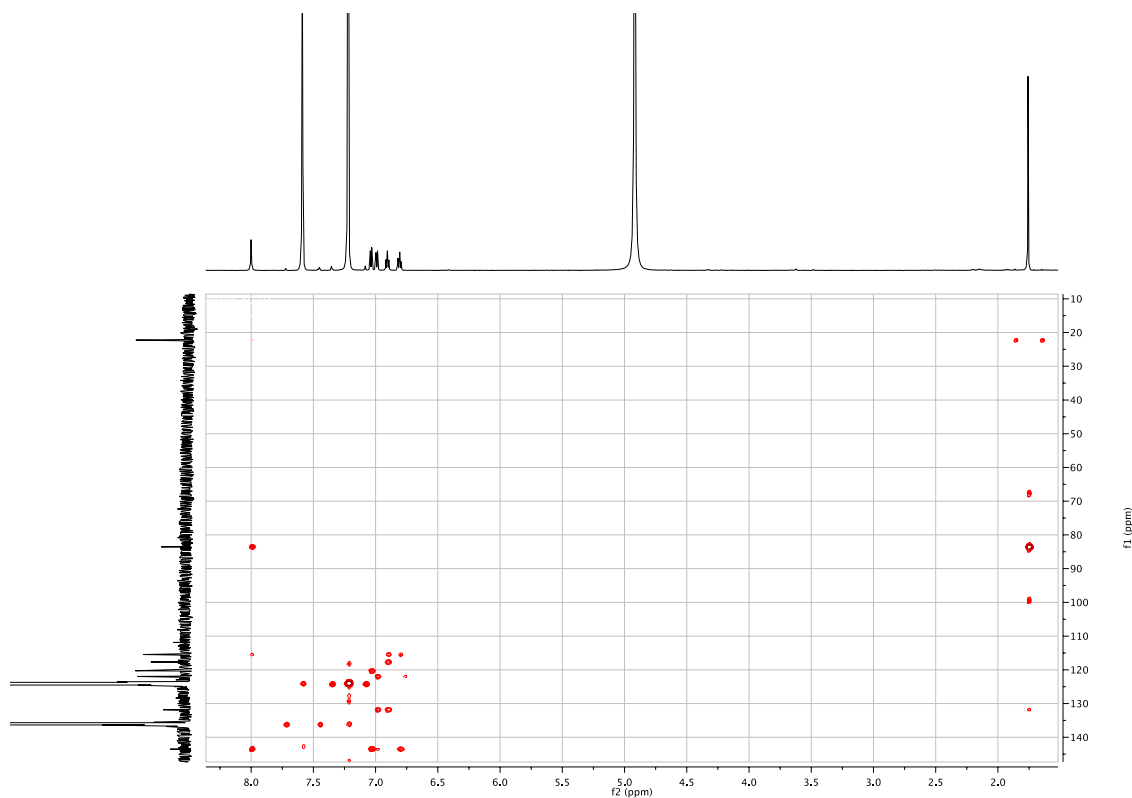

**Figure S9.** NMR titration of 1,6-dihydroxyphenazine (**12**) in fraction 24 sourced from *Actinokineospora* sp. EG49 in DMSO- $d_6$ .

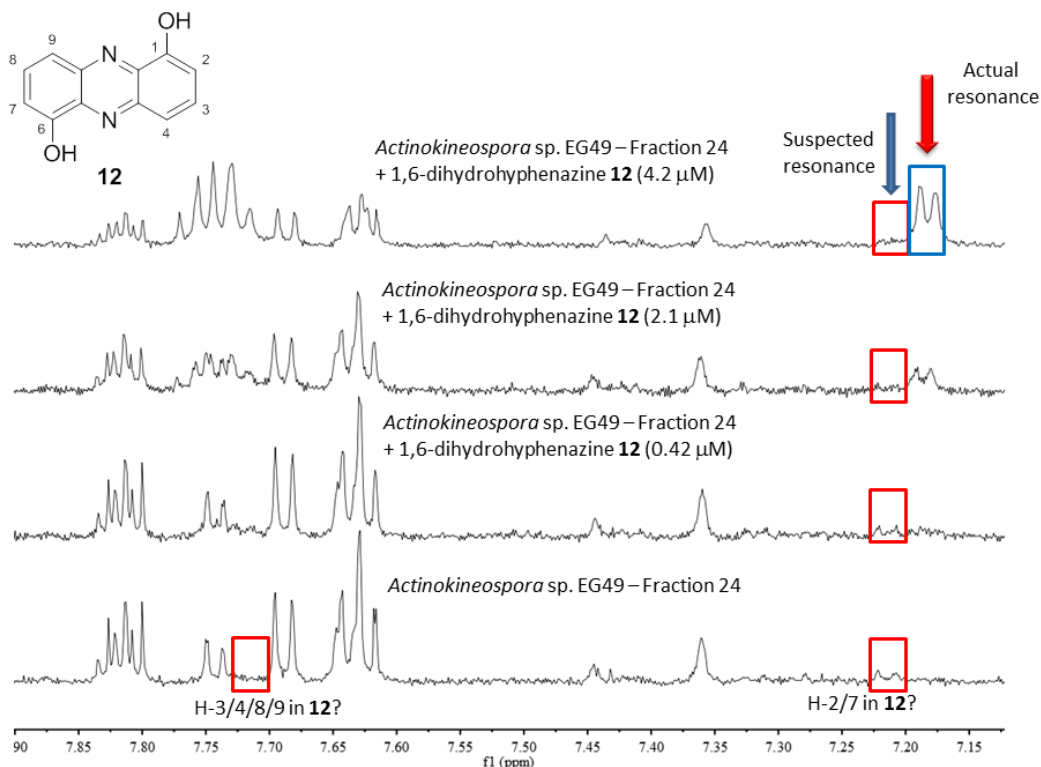

**Figure S10.**  $^1\text{H}$  NMR fingerprints of HPLC fractions 26 (**A**) and 27 (**B**) sourced from the EtOAc extracts of the *Nocardiosis* sp. and *Actinokineospora* sp. co-culture (black) and the *Actinokineospora* sp. monoculture (blue) and *Nocardiosis* sp. monoculture (red).

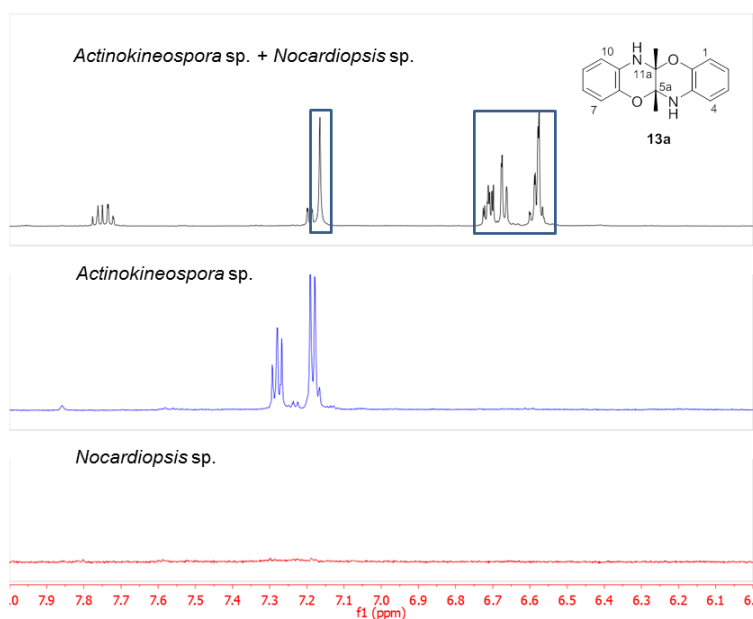

(A)

Figure S10. Cont.

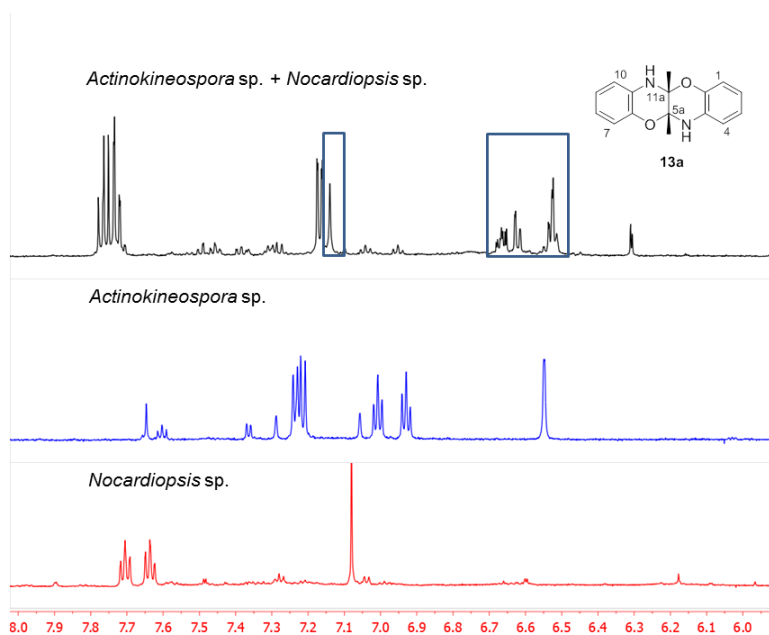

(B)

**Figure S11.** Biological activity of compounds **11**, **12** and **13** against *Bacillus* sp. P21, with the white arrow showing the inhibition zone diameter.

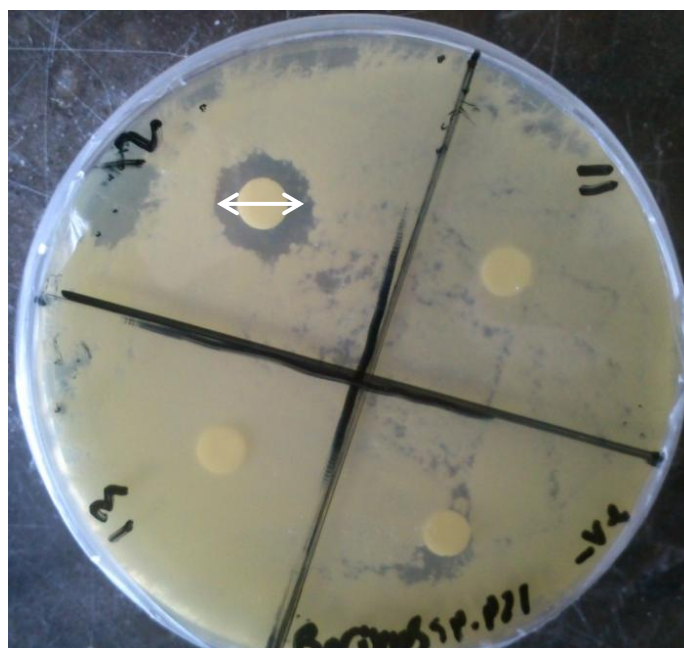

**Figure S12.** Biological activity of compounds **11**, **12** and **13** against *Actinokineospora* sp. EG49, with the white arrow showing the inhibition zone diameter.

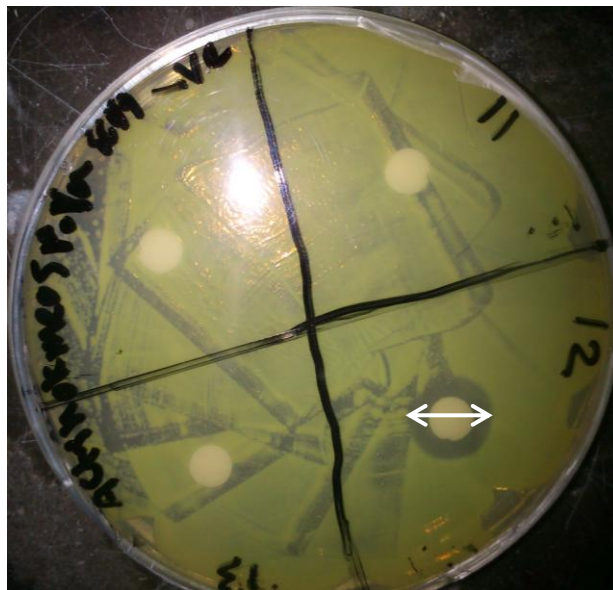

© 2014 by the authors; licensee MDPI, Basel, Switzerland. This article is an open access article distributed under the terms and conditions of the Creative Commons Attribution license (<http://creativecommons.org/licenses/by/3.0/>).
